# Supplementary material for: Polyamide-Scorpion Cyclam Lexitropsins Selectively Bind AT-Rich DNA Independently of the Nature of the Coordinated Metal
Source: PLoS One. 2011 May 9;6(5):e17446. doi: 10.1371/journal.pone.0017446 (PMC3090394; doi:10.1371/journal.pone.0017446)
Supplement: Spreadsheet S1 — Error calculations for Table 1. (XLS) [file pone.0017446.s026.xls]

## Sheet: Sheet1
	8.314	298
Compound	K	K error	H error		S error
4c	270000	30000	600		2.21523
5c	120000	20000	1700		5.87058
6c	150000	30000	2000		6.91433
